# 1 **AQMM: Enabling Absolute Quantification of Metagenome** 2 **and Metatranscriptome**

3 **Authors: Xiao-Tao Jiang, Ke Yu, Li-Guan Li, Xiao-Le, Yin, An-Dong, Li, Tong**  
4 **Zhang\***

5 **Affiliations: Environmental Biotechnology Laboratory, Department of Civil**  
6 **Engineering, University of Hong Kong**

7 \* Corresponding author Email: [zhangt@hku.hk](mailto:zhangt@hku.hk)

8 **November 12, 2017**

## 9 **Abstract**

10 Metatranscriptome has become increasingly important along with the application of  
11 next generation sequencing in the studies of microbial functional gene activity in  
12 environmental samples. However, the quantification of target active gene is hindered  
13 by the current relative quantification methods, especially when tracking the sharp  
14 environmental change. Great needs are here for an easy-to-perform method to obtain  
15 the absolute quantification. By borrowing information from the parallel metagenome,  
16 an absolute quantification method for both metagenomic and metatranscriptomic data  
17 to per gene/cell/volume/gram level was developed. The effectiveness of AQMM was  
18 validated by simulated experiments and was demonstrated with a real experimental  
19 design of comparing activated sludge with and without foaming. Our method provides  
20 a novel bioinformatic approach to fast and accurately conduct absolute quantification  
21 of metagenome and metatranscriptome in environmental samples. The AQMM can be  
22 accessed from <https://github.com/biofuture/aqmm>.

23 **Keywords:** metagenome, metatranscriptome, absolute quantification, differential  
24 expression genes

## 25 **Background**

26 Shotgun metatranscriptomics is a powerful tool in identifying the overall expression  
27 of microorganisms in an environment (Alexander et al. 2015, Gifford et al. 2011, Shi  
28 et al. 2009, Turner et al. 2013, Yu and Zhang 2012), shedding light on discovering  
29 how microbes respond to environmental changes or diseases status (Jorth et al. 2014,  
30 Mason et al. 2012) and capturing gene expression patterns for functionally important  
31 bacteria in engineering systems (Oyserman et al. 2015, Stark et al. 2014). For these  
32 applications, accurate quantification is required to detect the true variations or  
33 differential expression genes (DEGs).

34 Traditionally, the abundance of a transcript in RNA-sequencing (RNA-seq) is thought  
35 to be influenced by the library size and inherent dependence on the expression levels  
36 of other transcripts as described in a comprehensive review (Rapaport et al. 2013).  
37 Following this idea, transcripts in RNA-seq was generally quantified by  
38 within-sample normalization. One of the most common quantification methods was  
39 RPKM (Mortazavi et al. 2008) (reads per kilobase of exon model per million mapped  
40 reads) which considered factors of both the length of gene and library size. Another  
41 improved within-sample normalization method was TPM (transcript per million)  
42 (Wagner et al. 2012) which only considered the transcript rather than the whole  
43 library size and respected the invariance of relative molar RNA concentration (rmc).  
44 The TPM was thought to be better fitted in sample comparison due to its unit-free  
45 characteristics. The FPKM (substitute the reads with fragments in RPKM) was an  
46 adaption of RPKM to pair-end reads. These above methods are all relative  
47 quantification (RQ) and suffer from the ‘composition effects’ (the increase of one  
48 transcript will decrease other unrelated transcript). To relieve this problem, Robinson  
49 and Oshlack proposed a new normalization method “TMM” (trimmed mean of

50 M-values) to detect the DEGs under the hypothesis that most of the genes are not  
51 differentially expressed (Robinson and Oshlack 2010), which has been integrated into  
52 popular DEGs detection R software edgeR (Robinson et al. 2010). The scaling factor  
53 in edgeR for normalization is the TMM value. Another method was to compute the  
54 median of the ratio as the scaling factor and it could be conducted by R software  
55 DESeq/DESeq2 (Love et al. 2014). It is also based on the assumption that most genes  
56 are not DEGs and this method then calculates the scaling factor (median of ratios)  
57 associated with this sample to perform further normalization. In the two software, the  
58 negative binomial distribution was applied to adjust the distribution of transcript  
59 between different conditions to relieve the dispersion effects of deviation from  
60 standard poisson distribution (Rapaport et al. 2013). Although with these efforts in  
61 optimizing the normalization process, these indices were all still RQ based and the  
62 relationship could be distorted while performing comparative analysis across samples,  
63 especially when borrowing these methods from traditional Eukaryote RNA-seq to  
64 current Prokaryote metatranscriptome studies (Conesa et al. 2016). One feasible way  
65 to solve the problem was to get the absolute quantification (AQ) of expression level  
66 for each transcript. For example, the qRT-PCR has long been applied in RNA-seq or  
67 microarray data for AQ (Becker-André and Hahlbrock 1989, Whelan et al. 2003). In  
68 addition, there were methods by spiking in exterior/alien RNA in microarray to get the  
69 per cell absolute quantification (Kanno et al. 2006) and internal standard approach to  
70 estimate per liter expression in marine metatranscriptome (Gifford et al. 2011).  
71 However, the experiment to perform spiking internal standard was difficult due to its  
72 skill-demanding nature and for metatranscriptome data, factors like the time to add  
73 spike-in material, the type and the amount of alien RNA required still needed to be  
74 elaborately designed. Hence, it was not as popular as those RQ methods. The

75 quantification methods in the newly developed analyzing pipelines for  
76 metatranscriptome like IMP (Narayanasamy et al. 2016), MetaTrans (Martinez et al.  
77 2016), COMAN (Ni et al. 2016) and SAMSA (Westreich et al. 2016) were still all  
78 based on RQ methods; this would result in accelerated spreading of the inaccurate  
79 quantification in many studies.

80 To solve the problem of RQ and get an accurate quantification without performing  
81 spike-in experiment, an AQ bioinformatics software package AQMM was developed  
82 by combining metagenome and metatranscriptome data to achieve the goal of  
83 accurate and comparable quantification. In this study, we firstly introduced the  
84 AQMM algorithm flow, and then compared and validated it with RQ methods by  
85 simulated metagenome and metatranscriptome data. Moreover, we further applied this  
86 algorithm to a real combination of metagenome and metatranscriptome dataset in  
87 quantifying genes and transcripts of resistome in six foaming activated sludge (FAS)  
88 and non-foaming activated sludge (NFAS) samples.

## 89 **Results**

### 90 **Overall view of AQMM algorithm**

91 The AQMM (**Fig. 1**) was designed to perform AQ of parallel metagenome and  
92 metatranscriptome dataset no matter whether spike-in experiment/internal standard  
93 was initially added or not. The major aims were to obtain the AQ of  
94 genes/transcripts/taxa in samples and to accurately detect DEGs in metatranscriptome  
95 data. The assumptions under the algorithm include: 1) with the known extraction ratio  
96 of DNA for a DNA extraction Kit for a type of sample, the total weight of DNA per  
97 volume of the sample could be calculated. The weight of the sequenced library of  
98 DNA could be estimated with the molecular weight and bases numbers of A, T, C and

99 G in the sample. Then, the ratio of sequenced DNA to total weight of DNA per  
100 volume of the sample could be calculated. In addition, by utilizing the universal  
101 single-copy phylogenetic marker genes (USCMGs), the number of cells for a  
102 metagenome library could be estimated accurately (Nayfach and Pollard 2015). With  
103 the above information, cells per volume could be calculated for a metagenome data; 2)  
104 Using the same volume of the sample contains the same number of cells for DNA and  
105 RNA extraction, the cell number per volume to extract RNA was the same as the  
106 parallel DNA sample; 3) With the known ratio of RNA extraction and the rRNA ratio  
107 of total RNA, by a similar process, the sequenced RNA weight ratio could be  
108 calculated, and then the equivalent cell numbers in a metatranscriptome could be  
109 deduced accordingly. With the cell numbers included in the metagenome and  
110 metatranscriptome data, the abundance of gene/transcript could be normalized to per  
111 cell level. Moreover, as the number of cells per volume is available, per cell  
112 quantification could be easily transformed into per volume quantification.

### 113 **Comparing and validating AQMM with RQ methods using simulated** 114 **metatranscriptome demo**

115 To reveal the problem of RQ methods like RPKM, edgeR and DESeq2 and to assess  
116 the effectiveness of AQMM, simulated metatranscriptomic datasets comprised of  
117 known community structure and expression levels were generated (**Fig. 2; Details in**  
118 **methods**). The simulated data was with known ground truth absolute expression for  
119 each gene. For simplicity, to focus on the quantification of metatranscriptome in  
120 identifying DEGs, we assume the DNA content are not changed like what happens in  
121 a reactor with a stable biomass concentration, however the gene expression under  
122 condition A and B are significantly changed with fold of 2 or 16 in part of the bacteria  
123 like what happens under sharp environmental change. In order to focus only on the of

124 influence normalization methods, in generation of the simulated metatranscriptome,  
125 the base qualities of were all set with 50 and to eliminate the influence of mapping  
126 process, the mapping criteria of bowtie2 was set to exactly match without gap and  
127 mismatch allowed (bowtie2 parameters, -N 0 -L 31, --rdg 100,150 --rfg 100,150  
128 --gbar 100,150). The result of DEGs detection was in **Table 1**. We can observe that  
129 compared with ground truth, the RQ methods detect quite a large portion of false  
130 positive higher gene expression under condition A. On the contrary, the AQMM  
131 method which aims to obtain the AQ has limited errors detection even with a given  
132 variance in RNA extraction efficiency (**Table 1**). Noticeably, in real combination of  
133 metagenome and metatranscriptome, the metagenome could also be totally different,  
134 and in this case, the AQMM is still applicable.

### 135 **Case study: AQ of activate resistome in FAS and NFAS**

136 The AQMM was applied in the six metagenome and metatranscriptome dataset of  
137 FAS and NFAS, the AQ of the sequenced cells generated by the pipeline were shown  
138 in **Table 2**. In detail, the metagenome contained 8 to 11.8 GBs data and  
139 metatranscriptome with a depth between 13 and 16 GBs for each sample. The “per  
140 cell/volume” quantifying values were the fundamental of normalizing to cells or  
141 volume in order to perform comparison among different studies. The cell number per  
142 milliliter in literature was at  $3.3E+09$  using flow Cytometer to quantify (Foladori et al.  
143 2010) and was from  $2.1E+09$  to  $5.5E+09$  using CFU and flow Cytometer (Manti et al.  
144 2008) level for AS which was a bit lower than the obtained number in this study at the  
145 magnitude of  $E+10$  cells per milliliter. Overall number of mRNA molecules per cell  
146 are  $387.98 \pm 102.86$  and  $235.21 \pm 30.59$  averagely for FAS and NFAS, respectively  
147 (**Table S1**), which is consistent with previous observation of coastal bacterioplankton  
148 by 142-238 mRNA molecules per Cell (Gifford et al. 2011, Moran et al. 2013).

149

150 As WWTPs become the hot-spot of antibiotic resistant genes (ARGs) to the receiving  
151 environment. Hence, the expressions of ARGs in the AS were in great concerns and  
152 further profiled. Overall, the abundance of ARGs per cell in FAS and NFAS were  
153  $0.0517 \pm 0.0034$  and  $0.0483 \pm 0.0041$ ; and the transcript of ARGs per cell were  
154  $0.0140 \pm 0.0039$  and  $0.0059 \pm 0.0009$ , respectively (**Table S2 & S3**). The overall  
155 transcription of ARGs was significantly higher in FAS compared with NFAS. At DNA  
156 level, only tetracycline resistance gene was higher in FAS and beta-lactam was higher  
157 in NFAS, other types were not significantly different. However, at transcript level, all  
158 the types were all significantly higher in FAS. Among the nine transcribed ARGs  
159 types, beta-lactam and sulfonamide resistance genes were the most abundant  
160 expressed ARG types in both FAS and NFAS. Per volume ARGs abundance and  
161 expression at type level were shown in **Fig. 3**. The overall ARGs abundance per  
162 milliliter AS in FAS and NFAS were  $2.51E+09 \pm 2.44E+08$  and  $2.66E+09 \pm$   
163  $5.63E+08$ ; and the transcript of ARGs per milliliter were  $9.83E+09 \pm 3.82E+08$  and  
164  $4.49E+09 \pm 5.10E+08$ , respectively. With the AQ results, the transcripts per copy gene  
165 (TPCG), which represents of the transcribe rate could be further derived. The  
166 unclassified, quinolone, multidrug and beta-lactam were more active in FAS  
167 compared with NFAS in terms of TPCG, (**Table S4**). For the detected ARGs, the host  
168 taxonomy was assigned by LCA algorithms using all the genes annotation in the same  
169 Contig. Thirteen orders were detected to carry ARGs and eleven of them were  
170 transcribed (**Fig. 3**). The most ARGs transcribed order was Enterobacteriales. The  
171 active ARGs in bacteria enclosed in foams of FAS posed potential threats for the  
172 public as ARGs carrying bacteria could spread into the air from the foams bubbles.

173

174 The co-expression of ARGs and MRGs was also studied to check whether there were  
175 co-expression effects at the RNA level. Using this dataset, we observed co-expression  
176 within ARGs, within MRGs, and between ARGs and MRGs (**Fig. 4**). Numerous types  
177 of MRGs were detected in the metagenome and metatranscriptome. The most  
178 abundant MRG was Cu resistant genes and for the ARGs, beta-lactam, tetracycline  
179 and aminoglycoside were the most expressed types. The highest number of  
180 co-expression within MRGs was Cr and Fe; while within ARGs was beta-lactam and  
181 tetracycline. The most MRG and ARGs co-expression was Cr, which co-expression  
182 with nine types of ARGs. This was the first transcript level evidence of the  
183 co-expression of ARGs and MRGs in AS.

## 184 **Discussion**

185 Metatranscriptome enabled the study of whole metabolic pathways expression of the  
186 system and many studies had already taken this advantage for different environments,  
187 such as in marine (Mason et al. 2012), rhizosphere of the plant (Turner et al. 2013),  
188 human oral disease (Jorth et al. 2014). Each study has specific method to integrate the  
189 metagenome and metatranscriptome information to understand the microbes and their  
190 activities in the system. The quantification of metatranscriptome was generally RQ  
191 based methods. The RQ methods are problematic as they may not be able to reflect  
192 the actual expression level of a population in the whole community. Due to the  
193 relative characteristics, the RQ methods are always suffer from the so-called  
194 composition effects, which indicates that the upgrade of one gene should definitely  
195 make other genes downgrade. Additionally, the RQ methods are just a relative portion  
196 rather than a value with biological implications. On the contrary, the AQ could be  
197 more biological meaningful at per cell/volume unit. Hence, it was necessary to  
198 conduct AQ to compare different samples. In this study, we proposed an AQ method



199 and developed a set of algorithms to conveniently calculate the absolute number of  
200 sequenced cells for each RNA library by borrowing cell numbers from a  
201 corresponding data set of DNA library of the same sample.

202 Noticeably, there were several hypotheses for the application of the proposed method.  
203 Firstly, the sample used to extract DNA and RNA should contain the same cell  
204 numbers per volume which could be easily met with sufficient mixing of samples.  
205 Secondly, the DNA and RNA extraction efficiency should be estimated, as well as the  
206 rRNA ratio in total RNA. This was likely difficult to achieve. However, for an  
207 environmental sample, generally literature based data could be used for the extraction  
208 kit, for example, to FastDNA SPIN Kit for Soil, the extract efficiency was estimated  
209 as 28.4% (Mumy and Findlay 2004). Most importantly, as the parallel samples were  
210 extracted under the same condition, the difference between samples was minimized  
211 **(DNA extraction data, unpublished)**. This AQMM method is capable of performing  
212 absolute quantification of both metagenome and metatranscriptome without the  
213 requirement to do complex spike-in experiments. Importantly, AQMM avoids the RQ  
214 problems of composition effects and able to detect accurate DEGs. Hence, the  
215 proposed AQMM is a method in between experimental spike-in based AQ methods  
216 and those improved RQ methods of TMM based edgeR.

217 With AQ, a number of indices with various biological meaning were proposed in this  
218 study (Methods), for example, the transcript per copy gene (TPCG) index is a  
219 reflection of the transcribe rate of the gene, which could never be delivered by RQ  
220 methods. It was demonstrated with simulating RNA-seq that the organism abundance  
221 (community structure) was important at normalizing metatranscriptome data in  
222 identifying DEGs (Klingenberg and Meinicke 2017). The gene per cell (GPC) and  
223 transcript per cell (TPC) in AQMM are global level normalization indices and the

224 scaling factor is the total number of cells in the DNA or RNA library. This global  
225 scaling factor could be easily transformed into taxa specific scaling factors with the  
226 relative quantification of different taxa with indices of transcript of taxon A per cell  
227 (TTPC). Hence, the normalization in AQMM is well fit for the factor of microbial  
228 abundance in metatranscriptome data.

229 AS is important biological wastewater treatment process and this system is considered  
230 as a hot spot for ARG dissemination into the receiving water. The foaming of AS  
231 would result in spreading of foams with AS bacteria into the surrounding environment.  
232 Understanding the active resistome and the host bacteria in foaming AS enables  
233 engineers understanding the risk of sludge foaming incurred to the surrounding  
234 environment. We observed a wide profile of active ARG types in the FAS, the  
235 identification of opportunity pathogen bacteria *Pseudomonas* carrying active ARGs  
236 alerts us the risk of spreading ARGs-carrying bacteria. Additionally, per cell mRNA  
237 molecules is an important indication of the activity of the cell, generally natural  
238 bacterial communities was observed to hold a lower inventory of transcripts (Moran et  
239 al. 2013); and the absolute quantification obtained with AQMM was well-fitted with  
240 previous observation.

## 241 **Conclusions**

242 In this study, we filled the gap of lacking a bioinformatic algorithm to perform AQ of  
243 metatranscriptomic data. The developed AQMM was demonstrated to gain enhanced  
244 performance at identifying DEGs compared with those RQ methods benchmarked  
245 with simulated metagenomic and metatranscriptomic data. Additionally, with the  
246 AQMM, the active resistome in foaming and normal activated sludge were quantified  
247 to per cell/volume level and even down to the transcription per copy gene. The active

248 ARG host were quantified and the co-expression of MRGs and ARGs was revealed  
249 for the first time in AS.

## 250 **Materials and methods**

### 251 **Absolute quantification of gene abundance and transcript expression**

252 We developed a package of scripts AQMM (absolute quantification of metagenome  
253 /metatranscriptome) to perform comparative analysis.

254 The formula for cells per mL:

$$255 \quad C = N_c / \frac{L_{size} * 10^9 * \frac{(R_A * 313.2 + R_T * 304.2 + R_C * 289.18 + R_G * 329.21)}{6.022 * 10^{23}}}{X/\alpha} \quad (1)$$

256  $C$  is value of cell numbers per mL AS

257  $N_c$  is the estimated cell numbers for the sequenced DNA library with USCMGs

258  $L_{size}$  is the sequencing depth

259  $R_A, R_T, R_C$  and  $R_G$  are ratios of A, T, C and G

260  $X$  is the overall extracted weight (ng) of DNA for 1 mL AS

261  $\alpha$  is DNA extraction efficiency, for FAST DNA Kit for Soil,  $\alpha$  is estimated as 28.2%

262 (Mumy and Findlay 2004).

263 The sequenced cells for RNA sequencing, for a RNA-seq with library size of  $L_{size}$

264 after removing all ribosomal RNA, the equivalent sequenced cells for this sample is

$$265 \quad E_c = C * \frac{L_{size} * 10^9 * \frac{R_A * 329.2 + R_U * 306.2 + R_C * 305.2 + R_G * 345.2}{6.022 * 10^{23}}}{Y * \gamma / \beta} \quad (2)$$

266  $E_c$  is the estimated number of cells sequenced for this RNA library

267  $C$  is value of cell numbers per mL AS

268  $L_{size}$  is the sequencing depth

269  $R_A, R_U, R_C$  and  $R_G$  are ratios of A, U, C and G, the value they multiplied are molecular  
270 weight

271  $Y$  is the overall extracted weight (ng) of RNA for 1 mL AS

272  $\beta$  is RNA extraction efficiency, the estimated  $\beta$  is about 7.5% as used in this study.

273 This value was deduced from AS empirical data of proportion of RNA biomass by

274 engineering perspective and the extracted RNA biomass.

275  $\gamma$  is non-ribosomal RNA ratio, for AS the estimated  $\gamma$  is about 0.03.

276 Based on the two AQ numbers of cells for each sample, the gene or transcript

277 abundance matrix could be further normalized into the following indices.

278 **GPC** (Gene per Cell): an indication of the overall abundance of the gene in system.

$$279 \quad GPC = \frac{N_{read} * L_{read} / L_{gene}}{N_c} \quad (3)$$

280 **TPC** (Transcript per Cell): an indication of overall activity of the gene in system.

$$281 \quad TPC = \frac{N_{read} * L_{read} / L_{gene}}{E_c} \quad (4)$$

282 **TPCG** (Transcript per copy gene): an indication of the absolute activity of one copy

283 gene in the system, equivalent to transcribe rate for each gene.

$$284 \quad TPCG = TPC / GPC \quad (5)$$

285 **GTPC** (Gene of taxon A per Cell): an indication of the overall abundance of the taxon

286 in system averagely.

$$287 \quad GTPC = \sum_{i=1}^n GPC_i \quad (6)$$

288 **TTPC** (Transcript of taxon A per Cell): an indication of overall activity of the taxon

289 in system averagely.

$$290 \quad TTPC = \sum_{i=1}^n TPC_i \quad (7)$$

291 **ATCT** (Averagely transcript per copy gene of taxon A): indication of the averagely

292 absolute activity per copy expressed gene in taxon A

$$293 \quad ATCT = \frac{1}{n} \sum_{i=1}^n TPCG_i \quad (8)$$

294  $N_c$  is the estimated cell numbers for the sequenced DNA library,

295  $N_{read}$  is the number of reads or transcript mapping to the target gene

296  $L_{read}$  is the length of reads

297  $L_{gene}$  is the length of the target gene

298  $n$  is the number of genes affiliated to taxa A.

299 When the number of cells per mL was obtained, using the GPC, genes per mL could  
300 be calculated.

### 301 **Simulating metatranscriptome data**

302 To validate our method and comparing with those RQ methods in identifying the  
303 DEGs, simulated data was generated by workflow illustrated in **Fig. 2**. For simplicity,  
304 the DNA was set unchanged to mimic the activated sludge community composition  
305 with 16 strains from different phylogeny. The metatranscriptome data sets were  
306 generated for two conditions A and B, each with three biological duplications; for the  
307 condition A and B, there were part of the strains with folds of significantly changed  
308 expression (**Table S5**). To only focus on the quantification method, all the system  
309 errors caused by other factors like base qualities, cDNA synthesis, assembly, mapping  
310 parameters were not considered.

### 311 **Sampling**

312 AS samples were collected in Shatin wastewater treatment plant at three locations  
313 along the flow direction while serious foaming happened at 2016-04-08 and nearly no  
314 foaming happened at 2016-04-25. Samples were collected on site by storing in liquid  
315 nitrogen immediately and then transported to the laboratory for RNA extraction. The  
316 DNA samples were mixed with 1:1 100% ethanol and AS and then stored at -20 °C  
317 fridge. Totally six samples were collected for both DNA and RNA samples alongside  
318 the segment aeration tank in three locations as depicted in **Fig. 5**.

319 **Whole DNA, total RNA extraction, removal of ribosomal RNA, cDNA synthesis**  
320 **and next generation sequencing**

321 FAST DNA Kit was used to extract total DNA from 1 mL mixed AS samples. RNeasy  
322 Mini was used to extract the total RNA from 0.5 mL AS stored in liquid nitrogen. The  
323 extracted RNA was then processed by DNase I to eliminate the DNA in the RNA  
324 samples. Then both Illumina Ribo-Zero rRNA removal KIT (Bacteria) and Ribo-Zero  
325 rRNA removal KIT (Human/Mouse/Rat) was applied for each sample to remove  
326 rRNA from Prokaryote and Eukaryote respectively in order to get the total clean  
327 non-ribosomal RNA. Generally, metatranscriptome rRNA depletion was only used the  
328 Ribo-Zero for Bacteria, in this study, the addition of Eukaryote rRNA removal was  
329 due to a fact that by only using the Ribo-Zero Bacteria rRNA removal Kit for AS,  
330 there was still over half of RNA were rRNA from Eukaryote (our previous experiment,  
331 data unpublished). To get more non-rRNA, the Ribo-Zero rRNA Kit to remove  
332 Eukaryote was also used. RNA then was fragmented into 170 bps library and was  
333 reverse-transcribed to construct cDNA library for sequencing. The quality of DNA  
334 and RNA were assessed with Agilent 2100 Bioanalyzer (Agilent Technologies, Palo  
335 Alto, CA, USA). All the samples was sent to sequence, considering the complexity of  
336 AS and the aims of this study to detect the expression of low abundance gene, we  
337 gave each sample a very deep sequencing depth which doubled the sequencing depth  
338 in previous studies. All the samples were sequenced with Hiseq 4000 in  
339 BGI-ShenZhen. DNA samples with PE-150 with library size of 300 bps. And RNA  
340 with PE101 of library size 170 bps.

341 **Bioinformatics analysis**

342 Quality filtering was firstly performed on DNA and RNA reads to keep only high  
343 quality reads using trimmomatic v1.04 (Bolger et al. 2014). DNA datasets were

344 pooled together and assembled by CLC Genomics Workbench 6.5.3 (CLC Bio,  
345 Aarhus, Denmark, <https://www.qiagenbioinformatics.com/>) with default parameters.  
346 Finally, 1,430,611 contigs with length over 100 bps (N50, 2,416 bps; 2,457,704,443  
347 bps length in total) were obtained and 74.5% of reads could be mapped back to these  
348 Contigs. All these contigs were sent to predict genes with Prodigal (version 1.5)  
349 (Hyatt et al. 2010) using `-meta` parameter and finally 3,234,330 genes were obtained.  
350 By removing exactly the same genes using USEARCH (version 8.0.1623) (Edgar  
351 2010) unique command (parameters `-fastx_uniques`), 3,234,246 million genes were  
352 kept; this set was defined as ‘unique gene set’. Reads were mapped back to the contig  
353 set and ‘unique gene set’ to obtain reads coverage matrixes for contigs and genes. The  
354 matrix of genes was finally normalized to cell numbers. For metatranscriptome  
355 samples, after quality filtering, the SortMeRNAv1.9 was used to remove all the  
356 possible ribosomal RNA by aligning to six databases of bacteria, archaea and  
357 eukaryotic small and large subunits (Kopylova et al. 2012). RNA reads for each  
358 sample were then mapped back to the ‘unique gene set’ to get the transcript coverage  
359 for each gene with CLC genomic workbench 6.5.3 using parameters of gap penalty 2,  
360 gap extension 3, length fraction 0.8 and similarity at least 0.9.

361 Taxonomy composition of the metagenome was generated with MEGAN6 (Huson et  
362 al. 2015). In detail, all genes were aligned to NCBI NR database (version 201603)  
363 with diamondv1.09 (Buchfink et al. 2015) to find out the homology proteins. To each  
364 gene, the local common ancestors (LCA) were applied using the taxonomy  
365 information of the hit NR protein in NCBI taxonomy database (Acland et al. 2014)  
366 and then this gene was annotated with the common ancestor taxonomy. We further  
367 processed the NCBI taxonomy annotation results to remove those subdivisions and  
368 subgroups to format the annotation to 7 levels from kingdom to species. Among total

369 3,234,246 unique genes predicted, 2,348,907 could be aligned to NR database. The  
370 remaining 885,339 (27.3%) genes could not be annotated with the NR database. The  
371 abundance of each taxon was a sum of all the annotated genes under that taxon in  
372 every sample. Antibiotic resistant genes (ARGs) were annotated with SARG database  
373 which contained a type-subtype structure annotation (Yang et al. 2016). Metal  
374 resistance genes (MRGs) were detected by aligning the “unique gene set” to the MRG  
375 database (Li et al. 2017). Absolute abundance and transcript was determined by  
376 AQMM.

## 377 **Declarations**

### 378 *Data availability*

379 The metagenome and metatranscriptome raw data were deposited in NCBI SRA under  
380 accession number XXX.

### 381 *Analyzing document*

382 The analyzing document for the whole data analysis and simulation process could be  
383 accessed from

384 [https://github.com/biofuture/aqmm/blob/master/Analysing\\_document.txt](https://github.com/biofuture/aqmm/blob/master/Analysing_document.txt)

## 385 **Conflict of interest**

386 The authors declare no conflict of interest

## 387 **Acknowledgements**

388 The authors would like to thank GRF of Hong Kong for financial support  
389 (172099/14E). Xiaotao Jiang would like to thank The University of Hong Kong for  
390 the postgraduate scholarship, and Dr. Ke Yu, Dr. Li-Guan, and Dr. Andong, Li, would  
391 like to thank The University of Hong Kong for postdoc fellowship.



## 392 **Contributions**

393 T. Zhang and X.-T. Jiang design the study of quantification. X.-T. Jiang developed the  
394 software and performed the wet-lab and simulation experiments. X.-T. Jiang  
395 performed the bioinformatics analyses. X.-T. Jiang, A.D. Li and K. Y. did the DNA  
396 and RNA extraction experiment. L.-G. Li did the MRG analyses. T. Zhang and X.-T.  
397 Jiang wrote the manuscript. T. Zhang, X.-T. Jiang, A.D. Li, L.G. Li and X.L. Yin  
398 revised the manuscript.

## 399 **Reference**

400 Acland, A., Agarwala, R., Barrett, T., Beck, J., Benson, D.A., Bollin, C., Bolton, E., Bryant,  
401 S.H., Canese, K. and Church, D.M. (2014) Database resources of the national center for  
402 biotechnology information. *Nucleic acids research* 42(Database issue), D7.  
403 Alexander, H., Jenkins, B.D., Rynearson, T.A. and Dyhrman, S.T. (2015) Metatranscriptome  
404 analyses indicate resource partitioning between diatoms in the field. *Proceedings of the*  
405 *National Academy of Sciences* 112(17), E2182-E2190.  
406 Becker-André, M. and Hahlbrock, K. (1989) Absolute mRNA quantification using the  
407 polymerase chain reaction (PCR). A novel approach by a P CR aided t ranscript t itration assay  
408 (PATTY). *Nucleic acids research* 17(22), 9437-9446.  
409 Bolger, A.M., Lohse, M. and Usadel, B. (2014) Trimmomatic: a flexible trimmer for Illumina  
410 sequence data. *Bioinformatics*, btu170.  
411 Buchfink, B., Xie, C. and Huson, D.H. (2015) Fast and sensitive protein alignment using  
412 DIAMOND. *Nature Methods* 12(1), 59-60.  
413 Conesa, A., Madrigal, P., Tarazona, S., Gomez-Cabrero, D., Cervera, A., McPherson, A.,  
414 Szczesniak, M.W., Gaffney, D.J., Elo, L.L. and Zhang, X. (2016) A survey of best practices  
415 for RNA-seq data analysis. *Genome biology* 17(1), 13.  
416 Edgar, R.C. (2010) Search and clustering orders of magnitude faster than BLAST.  
417 *Bioinformatics* 26(19), 2460-2461.  
418 Foladori, P., Bruni, L., Tamburini, S. and Zigliio, G. (2010) Direct quantification of bacterial  
419 biomass in influent, effluent and activated sludge of wastewater treatment plants by using  
420 flow cytometry. *Water Research* 44(13), 3807-3818.  
421 Gifford, S.M., Sharma, S., Rinta-Kanto, J.M. and Moran, M.A. (2011) Quantitative analysis  
422 of a deeply sequenced marine microbial metatranscriptome. *The ISME journal* 5(3), 461-472.  
423 Huson, D., Beier, S., Buchfink, B., Flade, I., Górska, A., El-Hadidi, M., Mitra, S.,  
424 Ruscheweyh, H.-J. and Tappu, R. (2015) MEGAN6-Microbiome analysis involving hundreds

425 of samples and billions of reads, preparation.

426 Hyatt, D., Chen, G.L., Locascio, P.F., Land, M.L., Larimer, F.W. and Hauser, L.J. (2010)

427 Prodigal: prokaryotic gene recognition and translation initiation site identification. BMC

428 bioinformatics 11(1), 119.

429 Jorth, P., Turner, K.H., Gumus, P., Nizam, N., Buduneli, N. and Whiteley, M. (2014)

430 Metatranscriptomics of the human oral microbiome during health and disease. MBio 5(2),

431 e01012-01014.

432 Kanno, J., Aisaki, K.-i., Igarashi, K., Nakatsu, N., Ono, A., Kodama, Y. and Nagao, T. (2006)

433 " Per cell" normalization method for mRNA measurement by quantitative PCR and

434 microarrays. BMC genomics 7(1), 64.

435 Klingenberg, H. and Meinicke, P. (2017) How To Normalize Metatranscriptomic Count Data

436 For Differential Expression Analysis. bioRxiv, 134650.

437 Kopylova, E., Noé, L. and Touzet, H. (2012) SortMeRNA: fast and accurate filtering of

438 ribosomal RNAs in metatranscriptomic data. Bioinformatics 28(24), 3211-3217.

439 Li, L.G., Xia, Y. and Zhang, T. (2017) Co-occurrence of antibiotic and metal resistance genes

440 revealed in complete genome collection. ISME Journal 11(3), 651-662.

441 Love, M.I., Huber, W. and Anders, S. (2014) Moderated estimation of fold change and

442 dispersion for RNA-seq data with DESeq2. Genome biology 15(12), 550.

443 Manti, A., Boi, P., Falcioni, T., Canonico, B., Ventura, A., Sisti, D., Pianetti, A., Balsamo, M.

444 and Papa, S. (2008) Bacterial cell monitoring in wastewater treatment plants by flow

445 cytometry. Water Environment Research 80(4), 346-354.

446 Martinez, X., Pozuelo, M., Pascal, V., Campos, D., Gut, I., Gut, M., Azpiroz, F., Guarner, F.

447 and Manichanh, C. (2016) MetaTrans: an open-source pipeline for metatranscriptomics.

448 Scientific reports 6, 26447.

449 Mason, O.U., Hazen, T.C., Borglin, S., Chain, P.S., Dubinsky, E.A., Fortney, J.L., Han, J.,

450 Holman, H.-Y.N., Hultman, J. and Lamendella, R. (2012) Metagenome, metatranscriptome

451 and single-cell sequencing reveal microbial response to Deepwater Horizon oil spill. The

452 ISME journal 6(9), 1715-1727.

453 Moran, M.A., Satinsky, B., Gifford, S.M., Luo, H., Rivers, A., Chan, L.-K., Meng, J., Durham,

454 B.P., Shen, C. and Varaljay, V.A. (2013) Sizing up metatranscriptomics. The ISME journal

455 7(2), 237.

456 Mortazavi, A., Williams, B.A., McCue, K., Schaeffer, L. and Wold, B. (2008) Mapping and

457 quantifying mammalian transcriptomes by RNA-Seq. Nature methods 5(7), 621-628.

458 Mumy, K.L. and Findlay, R.H. (2004) Convenient determination of DNA extraction

459 efficiency using an external DNA recovery standard and quantitative-competitive PCR.

460 Journal of Microbiological Methods 57(2), 259-268.

461 Narayanasamy, S., Jarosz, Y., Muller, E.E., Heintz-Buschart, A., Herold, M., Kaysen, A.,

462 Laczny, C.C., Pinel, N., May, P. and Wilmes, P. (2016) IMP: a pipeline for reproducible

463 reference-independent integrated metagenomic and metatranscriptomic analyses. *Genome*  
464 *biology* 17(1), 260.

465 Nayfach, S. and Pollard, K.S. (2015) Average genome size estimation improves comparative  
466 metagenomics and sheds light on the functional ecology of the human microbiome. *Genome*  
467 *biology* 16(1), 51.

468 Ni, Y., Li, J. and Panagiotou, G. (2016) COMAN: a web server for comprehensive  
469 metatranscriptomics analysis. *BMC genomics* 17(1), 622.

470 Oyserman, B.O., Noguera, D.R., del Rio, T.G., Tringe, S.G. and McMahon, K.D. (2015)  
471 Metatranscriptomic insights on gene expression and regulatory controls in *Candidatus*  
472 *Accumulibacter phosphatis*. *The ISME journal*.

473 Rapaport, F., Khanin, R., Liang, Y., Pirun, M., Krek, A., Zumbo, P., Mason, C.E., Socci, N.D.  
474 and Betel, D. (2013) Comprehensive evaluation of differential gene expression analysis  
475 methods for RNA-seq data. *Genome biology* 14(9), 3158.

476 Robinson, M.D., McCarthy, D.J. and Smyth, G.K. (2010) edgeR: a Bioconductor package for  
477 differential expression analysis of digital gene expression data. *Bioinformatics* 26(1),  
478 139-140.

479 Robinson, M.D. and Oshlack, A. (2010) A scaling normalization method for differential  
480 expression analysis of RNA-seq data. *Genome biology* 11(3), R25.

481 Shi, Y.M., Tyson, G.W. and DeLong, E.F. (2009) Metatranscriptomics reveals unique  
482 microbial small RNAs in the ocean's water column. *nature* 459(7244), 266-U154.

483 Stark, L., Giersch, T. and Wünschiers, R. (2014) Efficiency of RNA extraction from selected  
484 bacteria in the context of biogas production and metatranscriptomics. *Anaerobe* 29, 85-90.

485 Turner, T.R., Ramakrishnan, K., Walshaw, J., Heavens, D., Alston, M., Swarbreck, D.,  
486 Osbourn, A., Grant, A. and Poole, P.S. (2013) Comparative metatranscriptomics reveals  
487 kingdom level changes in the rhizosphere microbiome of plants. *The ISME journal* 7(12),  
488 2248-2258.

489 Wagner, G.P., Kin, K. and Lynch, V.J. (2012) Measurement of mRNA abundance using  
490 RNA-seq data: RPKM measure is inconsistent among samples. *Theory in Biosciences* 131(4),  
491 281-285.

492 Westreich, S.T., Korf, I., Mills, D.A. and Lemay, D.G. (2016) SAMSA: a comprehensive  
493 metatranscriptome analysis pipeline. *BMC bioinformatics* 17(1), 399.

494 Whelan, J.A., Russell, N.B. and Whelan, M.A. (2003) A method for the absolute  
495 quantification of cDNA using real-time PCR. *Journal of immunological methods* 278(1),  
496 261-269.

497 Yang, Y., Jiang, X.T., Chai, B.L., Ma, L.P., Li, B., Zhang, A.N., Cole, J.R., Tiedje, J.M. and  
498 Zhang, T. (2016) ARGs-OAP: online analysis pipeline for antibiotic resistance genes  
499 detection from metagenomic data using an integrated structured ARG-database.  
500 *Bioinformatics* 32(15), 2346-2351.

501 Yu, K. and Zhang, T. (2012) Metagenomic and metatranscriptomic analysis of microbial  
 502 community structure and gene expression of activated sludge. Plos One 7(5), e38183.  
 503

504 **Figures and legends**

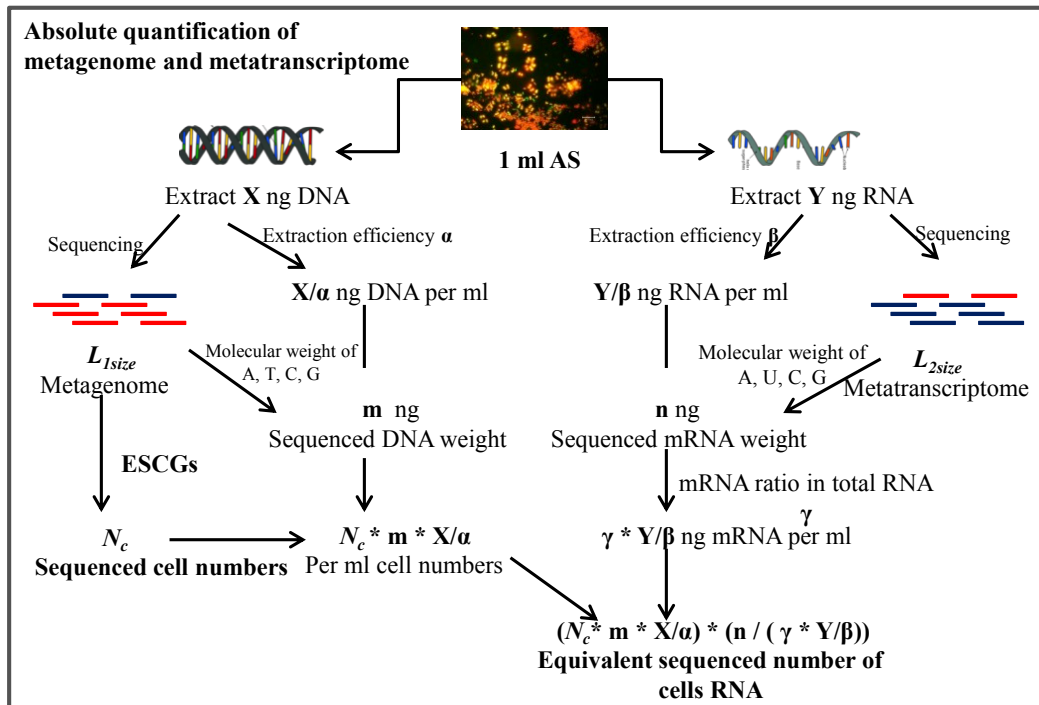

505  
 506 **Fig. 1:** Schematic flow diagram for absolute quantification of metagenome and  
 507 metatranscriptome to cell/volume level.

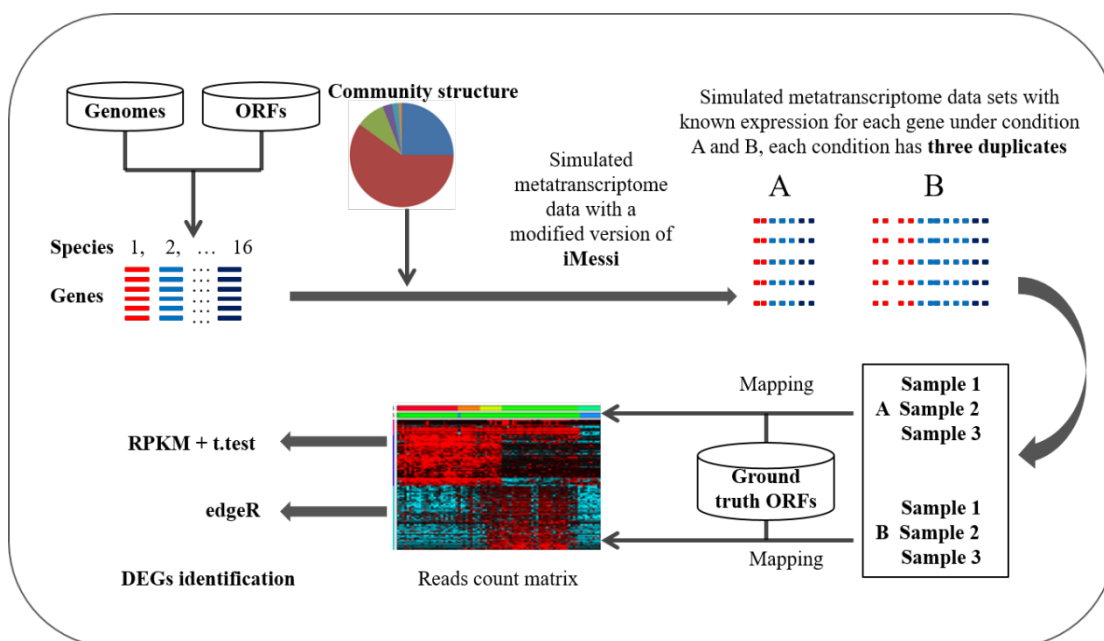

508

509 **Fig. 2** Flowchart of the simulation datasets generation and analyzing process to get  
 510 the differential expression genes.

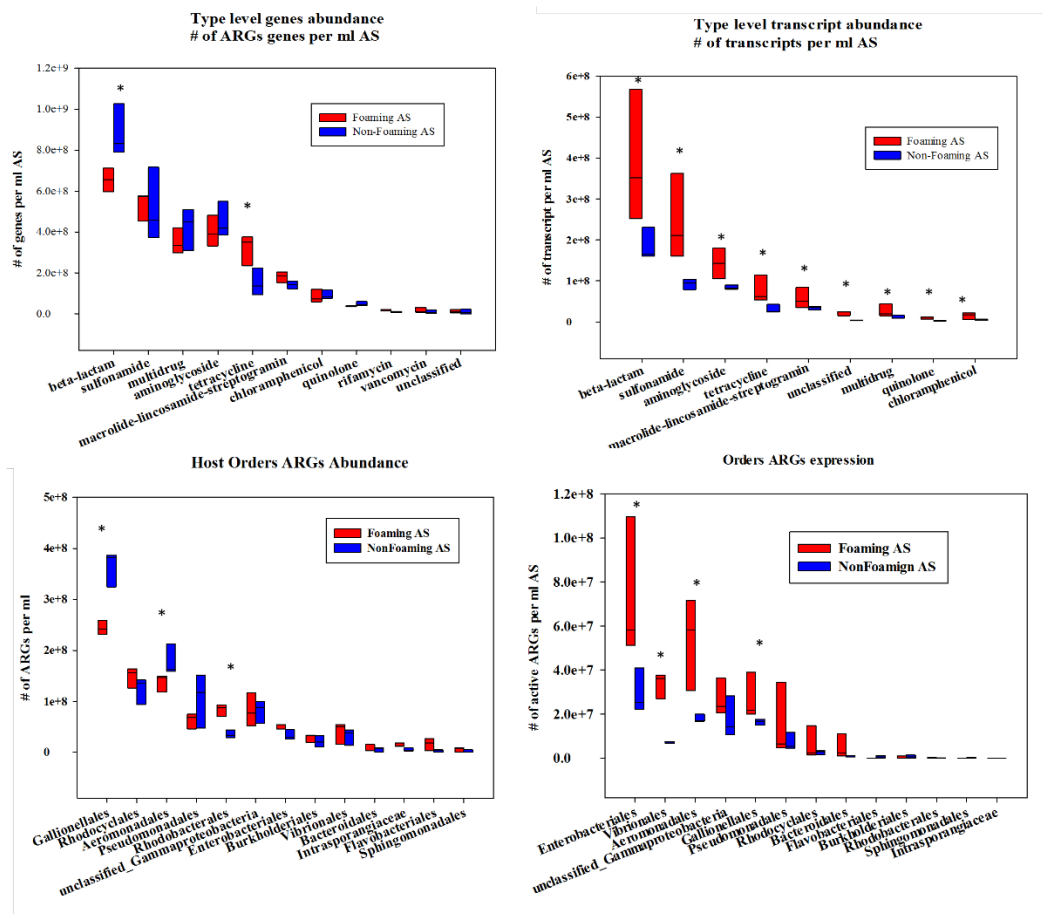

511

512 **Fig. 3:** Absolute quantification of type level ARGs abundance and transcription in  
 513 FAS and NFAS. ARGs-carry hosts abundance and expression. \* represents significant  
 514 difference ( $P$ -value < 0.05).

515

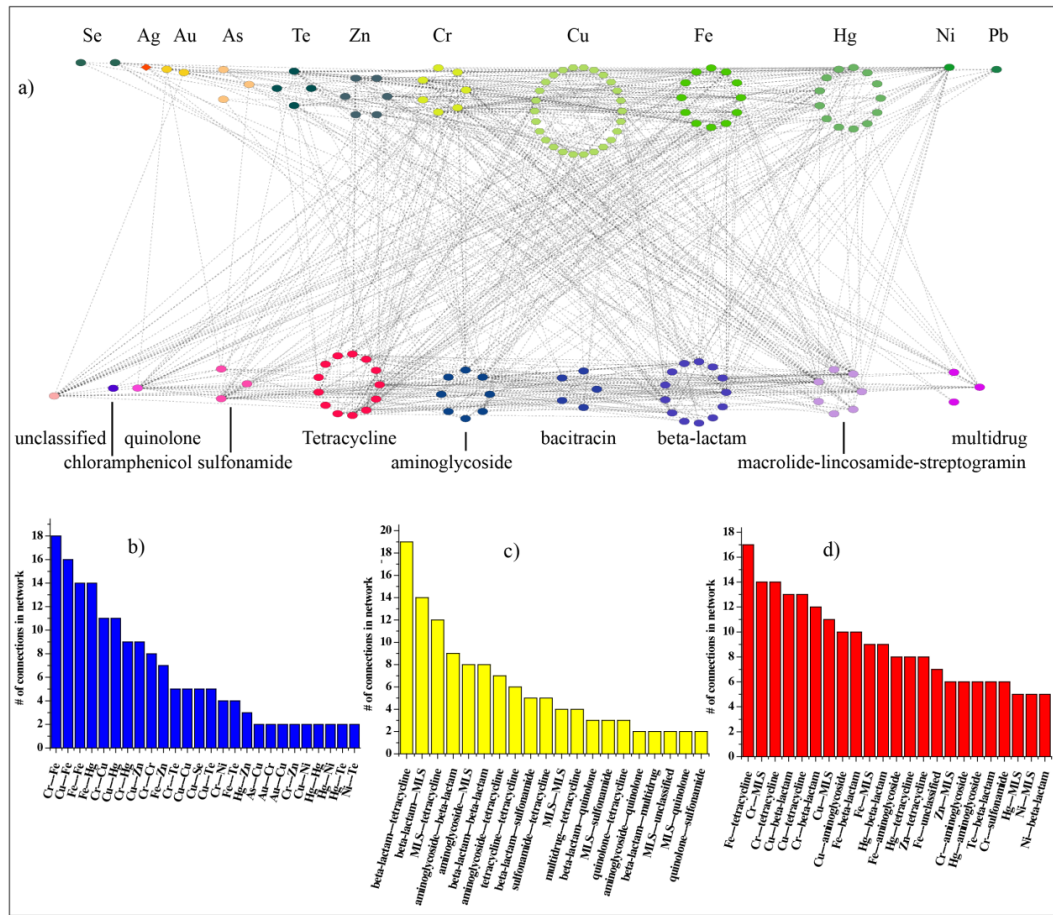

516

517 **Fig. 4:** Co-expression of ARGs and MRGs in Shatin AS, a) was the network of ARGs  
 518 and MRGs expression; b) was statistical of co-expression within MRGs; c) was  
 519 statistical of co-expression with ARGs; d) was statistical of co-expression of ARGs  
 520 and MRGs. Lines in the network represented Spearman association over 0.6, *P*-value  
 521 0.05 the *P*-value was adjusted with B-H method.

522

523

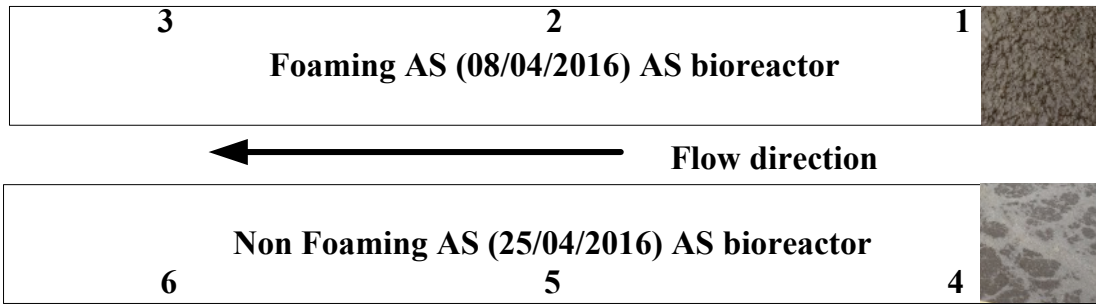

524

525 **Fig. 5** Samples were collected for foaming activated sludge at 08/04/2016 and  
526 non-foaming activated sludge at 25/04/2016 alongside the bioreactor at Shatin  
527 wastewater treatment plant.

528

529 **Table 1** Comparing relative quantification methods with AQMM on detection of  
 530 DEGs for simulated metatranscriptome data.

|                                  | <b># of genes Higher<br/>expression in B</b> | <b>No expression<br/>difference</b> | <b># of genes<br/>Higher<br/>expression in A</b> |
|----------------------------------|----------------------------------------------|-------------------------------------|--------------------------------------------------|
| <b>Theoretical Ground Truth</b>  | <b>28524</b>                                 | <b>36572</b>                        | <b>0</b>                                         |
| <b>RPKM+t-Test (P &lt; 0.05)</b> | 16477                                        | 11558                               | <b>37062</b>                                     |
| <b>edgeR</b>                     | 18278                                        | 20778                               | <b>26040</b>                                     |
| <b>AQMM-5%-variation</b>         | 28744.72 ± 143.53                            | 35807.52 ± 48.08                    | <b>543.77 ± 129.72</b>                           |
| <b>AQMM-10%-variation</b>        | 28740.83 ± 298.43                            | 35801 ± 188.31                      | <b>554.17 ± 256.81</b>                           |
| <b>AQMM-20%-variation</b>        | 28549.48 ± 1007.17                           | 35941.86 ± 919.86                   | <b>604.66 ± 654.76</b>                           |
| <b>AQMM-50%-variation</b>        | 16673.93 ± 9394.27                           | 47694.99 ± 9600.33                  | 727.08 ± 1775.09                                 |

531

532

533 **Table 2:** Summary of sequencing outputs and absolute quantification of each sample  
 534 at cell level with AQMM.

| <b>Sample ID</b> | <b>Type</b> | <b>Library<br/>(bps<br/>data)</b> | <b>size Total<br/>clean DNA<br/>(ng/mL)</b> | <b>extracted<br/>and<br/>RNA sequenced</b> | <b>Estimated<br/>cells *</b> | <b>Estimated<br/>cells per mL<br/>*</b> |
|------------------|-------------|-----------------------------------|---------------------------------------------|--------------------------------------------|------------------------------|-----------------------------------------|
| DNA1             | Foaming AS  | 8,567,524,200                     | 49,140                                      |                                            | 1,541                        | <b>6.11E+10</b>                         |
| DNA2             | Foaming AS  | 11,786,228,700                    | 54,600                                      |                                            | 2,179                        | <b>6.98E+10</b>                         |
| DNA3             | Foaming AS  | 10,108,576,800                    | 58,380                                      |                                            | 1,919                        | <b>7.66E+10</b>                         |
| DNA4             | Normal AS   | 8,755,895,700                     | 57,974                                      |                                            | 1,425                        | <b>6.52E+10</b>                         |
| DNA5             | Normal AS   | 9,196,724,100                     | 66,752                                      |                                            | 1,541                        | <b>7.73E+10</b>                         |



|      |            |                |        |                |                 |
|------|------------|----------------|--------|----------------|-----------------|
| DNA6 | Normal AS  | 11,185,847,400 | 75,194 | 1,957          | <b>9.09E+10</b> |
| RNA1 | Foaming AS | 14,894,959,100 | 12,270 | <b>98,936</b>  |                 |
| RNA2 | Foaming AS | 13,598,855,700 | 12,710 | <b>99,744</b>  |                 |
| RNA3 | Foaming AS | 15,551,044,400 | 20,290 | <b>78,449</b>  |                 |
| RNA4 | Normal AS  | 15,376,790,700 | 8,350  | <b>160,343</b> |                 |
| RNA5 | Normal AS  | 16,156,607,900 | 8,790  | <b>189,776</b> |                 |
| RNA6 | Normal AS  | 13,700,741,100 | 10,735 | <b>154,925</b> |                 |

\*: Estimated sequenced cells for DNA libraries was using MicrobeCensus and for RNA libraries using AQMM. The assumption for AQMM was that per ml sample used for DNA and RNA extraction contained the same number of cells.

535
